# Supplementary material for: Bayesian Multivariate Genetic Analysis Boosts Translational Insights
Source: Research Square preprint supplement (doi:10.21203/rs.3.rs-1319235/v1), 2022-02-15
Supplement: Supplementary file 1 [file 68a1be435539c70b2ad2864e.xlsx]

## Sheet: Supplementary Table 1
MODEL	HDL_r2	2*se	LDL_r2	2*se2	TG_r2	2*se3	TC_r2	2*se4
Baseline_all	0.203	0.02	0.033	0.01	0.076	0.014	0.051	0.012
MLE_all_inf	0.234	0.021	0.081	0.015	0.149	0.019	0.095	0.016
mash_all_inf	0.289	0.022	0.129	0.018	0.162	0.019	0.131	0.018
baselin_non_eur	0.201	0.02	0.004	0.004	0.0926	0.015	0.021	0.008
MLE_non_eur_inf	0.208	0.02	0.037	0.01	0.161	0.019	0.064	0.013
mash_non_eur_inf	0.259	0.021	0.065	0.013	0.144	0.018	0.084	0.015
baseline_eur	0.184	0.02	0.036	0.01	0.062	0.013	0.051	0.012
MLE_eur_inf	0.26	0.021	0.096	0.016	0.137	0.018	0.103	0.016
mash_eur_inf	0.296	0.022	0.151	0.019	0.161	0.019	0.145	0.018
Table S1. Performance of LDpred2 model after providing univariate or multivariate (posterior means) as inputs to the model detailed in (20)
eur=european individuals in UKB, non-eur=non-EUR individuals in UKB, HDL-C = high-density cholesterol, LDL-C = low-density cholesterol, mash = multivariate adaptive shrinkage, mle=univariate maximum likelihood estimate,TC = total cholesterol, TG = triglycerides.

## Sheet: Supplementary Table 2
Rank	HDL-C_mash	LDL-C_mash	TC_mash	HDL-C_MLE	LDL_C-MLE	TG-MLE
1	APOE	UBC	APOE	UBC	UBC	UBC
2	APOA2	APOE	UBC	APOE	APOA1	APOE
3	UBC	APOA1	APOC3	APOA2	UGT2B10	SCARB1
4	APOB	APOA2	APOA1	APOA1	UGT2B4	APOA2
5	APOA1	APOC3	SCARB1	APOB	UGT2B11	LDLR
6	APOC3	APOB	APOA2	SCARB1	APOA2	APOB
7	SCARB1	SCARB1	LDLR	APOC3	UGT2B15	LPL
8	ABCG1	ABCG1	APOA5	LPL	UGT2B28	LCAT
9	LPL	LDLR	CD36	ABCG1	UGT2B17	APOA1
10	NR1H2	LPL	APOB	CD36	APOE	APOC3
11	NR1H3	NR1H3	NR1H3	NR1H2	UGT2B7	IGF1
12	ABCA1	LIPC	APOC1	LDLR	UGT2A3	APOC1
13	APOC1	LCAT	NR1H2	LIPC	UGT2A1	NR1H2
14	LIPC	ABCA1	LPL	APOC1	TP53	ABCG1
15	CD36	APOA5	LRP1	ABCA1	LDLR	LRP1
16	LCAT	NR1H2	ABCG1	LCAT	UGT2A1	TGFB1
17	LDLR	APOC1	MTTP	NR1H3	APOC3	UGT2B17
18	CETP	APOM	ABCA1	CETP	PPARG	UGT2B7
19	APOM	CD74	LCAT	LRP1	PLCG1	UGT2B4
20	PPARG	MTTP	LIPC	PPARG	IL6	NR1H3
21	LRP1	CETP	UGT2B4	APOM	LIPC	ABCA1
22	APOA5	LRP1	UGT2B15	INSR	IFNG	UGT2B15
23	AKT1	EP300	UGT2B17	PPARA	SMARCC2	UGT2A1
24	PPARA	CD36	UGT2A3	AKT1	APOB	CD36
25	MTTP	SREBF1	APOM	RXRA	APOA5	UGT2B10
Table S1. Top 25 genes prioritized by PoPs (17) using multivariate (mash) or univariate (z) summary statistics for the effect of a variant on lipid levels.
HDL-C = high-density cholesterol, LDL-C = low-density cholesterol, mash = multivariate adaptive shrinkage, mle=univariate maximum likelihood estimate,TC = total cholesterol, TG = triglycerides.

## Sheet: Supplementary Table 3
LDL-C	HDL-C	TG
LDLR	APOA4	LPL
APOB	ABCA1	APOA5
PCSK9	LCAT	APOC3
ABCG5	CETP	GPIHBP1
ABCG8	LIPC	LMF1
APOE	LIPG	ANGPTL3
	SCARB1	ANGPTL3
Table S3. Genes prioritized in table S1. from (10) according to mixed model SKAT association of disruptive protein-coding mutations and blood lipids
HDL-C = high-density cholesterol, LDL-C = low-density cholesterol, mash = multivariate adaptive shrinkage, mle=univariate maximum likelihood estimate,TC = total cholesterol, TG = triglycerides.

## Sheet: Supplementary Table 4
LDL-C Mash	LDL-C MLE	HDL-C Mash	HDL-C MLE	TG Mash	TG-MLE
31	38	14	15	88	100
Table S4. Median Rank of genes available in Table S2. as prioritized by PoPs using mash or univariate input
HDL-C = high-density cholesterol, LDL-C = low-density cholesterol, mash = multivariate adaptive shrinkage, mle=univariate maximum likelihood estimate,TC = total cholesterol, TG = triglycerides.

## Sheet: Supplementary Table 5
MASH_TORUS	HDL				LDL				TG				TC
annotation	log2OR	CI_low	CI_high		Log2OR	CI_low	CI_high		log2OR	CI_low	CI_high		log2OR	CI_low	CI_high
alleleage	-2.4987	-9.2376	4.2415		-4.9528	-15.0935	5.1865		-2.493	-9.6704	4.683		-4.2545	-13.0045	4.494
Ancient_Sequence_Age_Human_Enhancer	3.0672	1.4384	4.6945		3.0499	1.2018	4.8979		3.1422	1.1931	5.0913		2.5608	0.541	4.582
Ancient_Sequence_Age_Human_Promoter	4.5228	3.3081	5.739		5.1288	4.0165	6.2425		5.136	3.9818	6.2887		4.9441	3.7467	6.1401
Backgrd_Selection_Stat	-0.6507	-0.8974	-0.404		-0.0346	-0.2972	0.2265		-0.6853	-0.9493	-0.4198		-0.2453	-0.4948	0.0029
Coding_UCSC	3.9357	3.1956	4.6772		4.204	3.4062	5.0018		4.4002	3.5966	5.2024		3.9501	3.1407	4.7595
Coding_UCSC.extend.500	3.1999	2.7209	3.6789		3.5173	2.9821	4.0525		3.2865	2.7426	3.8318		3.3831	2.8666	3.8982
Conserved_Mammal_phastCons46way	2.4266	1.5596	3.2937		2.7945	1.8769	3.7121		2.8464	1.8914	3.8029		2.2506	1.3056	3.1956
Conserved_Primate_phastCons46way	2.695	1.8625	3.5274		1.8279	0.6665	2.9907		3.1638	2.2751	4.0525		1.8106	0.7718	2.8493
Conserved_Vertebrate_phastCons46way	2.2434	1.4283	3.0571		2.5002	1.6461	3.3528		2.4598	1.5379	3.3817		2.2679	1.4499	3.0859
CTCF_Hoffman	1.1758	-0.1096	2.4598		2.0501	0.9305	3.171		0.7502	-0.8137	2.3155		1.9101	0.8483	2.9705
CTCF_Hoffman.extend.500	0.9825	0.2265	1.7384		1.5307	0.7358	2.3256		1.5509	0.792	2.3098		1.6288	0.9392	2.317
DGF_ENCODE	1.8726	1.385	2.3602		2.0198	1.4816	2.5593		1.8582	1.2999	2.4151		1.5047	0.9652	2.0429
DGF_ENCODE.extend.500	1.6317	1.3532	1.9101		2.0486	1.7327	2.3646		1.8495	1.5466	2.1539		1.8654	1.5725	2.1583
GTEx_FE_META_TISSUE_GE_MaxCPP	4.6152	-4.2112	13.443		-3.4538	-71.2287	64.3211		-2.2809	-44.9977	40.4359		-4.8042	-145.972	136.365
H3K27ac_Hnisz	2.7656	2.467	3.0628		1.9173	1.5769	2.2578		2.3934	2.0746	2.7123		1.9664	1.6533	2.2809
H3K4me1_peaks_Trynka	1.8106	1.3749	2.2477		1.7702	1.2638	2.2751		1.9072	1.4225	2.392		1.8236	1.3633	2.2838
H3K9ac_peaks_Trynka	2.8248	2.0861	3.5635		2.9647	2.1842	3.7438		2.7555	1.8856	3.624		2.8464	2.089	3.6053
Human_Enhancer_Villar	2.405	1.6216	3.1884		3.0874	2.2968	3.878		2.8998	2.1179	3.6803		2.9777	2.2304	3.725
Human_Enhancer_Villar.extend.500	2.1006	1.3662	2.8349		2.7685	2.0183	3.5187		2.594	1.8567	3.3326		2.643	1.9318	3.3543
Intron_UCSC	0.6406	0.3333	0.9464		0.629	0.2727	0.9854		0.805	0.4761	1.1354		0.7675	0.4458	1.0892
Intron_UCSC.extend.500	1.2551	0.9637	1.5466		1.2955	0.9623	1.6302		1.3489	1.033	1.6649		1.2494	0.9435	1.5552
PromoterFlanking_Hoffman	1.763	-0.1472	3.6731		2.3357	0.1616	4.5113		2.8609	1.0979	4.6238		2.164	0.215	4.1131
Promoter_UCSC	2.2174	1.4975	2.9388		3.2634	2.5969	3.9299		3.36	2.7152	4.0035		3.0412	2.3963	3.6861
Repressed_Hoffman	-2.5824	-3.0181	-2.1467		-3.5736	-4.1319	-3.0152		-2.6459	-3.1105	-2.1814		-3.1999	-3.6904	-2.7094
SuperEnhancer_Hnisz	1.9693	1.5812	2.3559		1.4917	1.0286	1.9563		2.0097	1.5999	2.4194		1.724	1.3114	2.1366
TSS_Hoffman	3.3182	2.4281	4.2083		4.0294	3.1797	4.8806		3.9732	3.1076	4.8388		4.0338	3.2389	4.8273
UTR_3_UCSC	2.9893	1.7817	4.1954		3.3427	2.1684	4.5185		3.337	1.9895	4.6844		3.2158	2.1222	4.3079
WeakEnhancer_Hoffman	1.7182	0.5049	2.9316		2.0212	0.7632	3.2792		1.7933	0.3852	3.2013		2.4641	1.3417	3.5851
Table S5: Annotation Parameter estimated enrichment after providing multivariate posterior means (mash) into the empical bayes annotation framework in (16). Annotation parameters are described in (18)
HDL-C = high-density cholesterol, LDL-C = low-density cholesterol, mash = multivariate adaptive shrinkage, mle=univariate maximum likelihood estimate,TC = total cholesterol, TG = triglycerides.

## Sheet: Supplementary Table 6
	HDL				LDL				TG				TC
MLE	log2OR	CI_low	CI_upper		log2OR	CI_low	CI_upper		log2OR	CI_low	CI_high		log2OR	CI_low	CI_high
alleleage	-0.0289	-1.4528	1.3951		-2.5608	-6.1603	1.0387		-0.7964	-3.197	1.6057		-2.0587	-5.338	1.2191
Ancient_Sequence_Age_Human_Enhancer	2.7541	1.5898	3.9169		3.513	2.3357	4.6902		3.2316	2.0544	4.4089		3.2042	2.0039	4.4045
Ancient_Sequence_Age_Human_Promoter	4.0309	3.2071	4.8547		4.4969	3.6212	5.3726		4.4435	3.6414	5.2456		4.5315	3.6702	5.3928
Backgrd_Selection_Stat	-0.202	-0.3188	-0.0851		-0.2251	-0.3722	-0.0779		-0.2453	-0.3708	-0.1212		-0.1688	-0.3087	-0.0274
Coding_UCSC	2.1424	1.5884	2.6978		2.8219	2.2117	3.4322		2.4483	1.8798	3.0167		2.6416	2.0154	3.2691
Coding_UCSC.extend.500	2.0241	1.7038	2.3458		2.5637	2.1915	2.9344		2.0688	1.724	2.4136		2.5391	2.1857	2.8926
Conserved_Mammal_phastCons46way	1.9895	1.411	2.568		1.8986	1.1931	2.6041		2.3473	1.7341	2.9604		2.0025	1.297	2.7065
Conserved_Primate_phastCons46way	2.0818	1.5062	2.6589		1.3273	0.541	2.1135		2.5622	1.9635	3.1595		1.6649	0.9017	2.4281
Conserved_Vertebrate_phastCons46way	1.6764	1.1253	2.2275		1.6129	0.945	2.2809		1.8265	1.222	2.4295		1.6476	0.9955	2.3011
CTCF_Hoffman	0.1861	-0.6146	0.9868		1.0806	0.176	1.9837		0.616	-0.2164	1.4499		0.857	-0.0245	1.7384
CTCF_Hoffman.extend.500	0.3376	-0.1068	0.7819		1.0849	0.5295	1.6389		0.7964	0.2986	1.2955		1.0676	0.5468	1.587
DGF_ENCODE	1.6706	1.3763	1.965		1.7817	1.4239	2.1395		1.7644	1.447	2.0818		1.5192	1.1628	1.8741
DGF_ENCODE.extend.500	1.3864	1.2393	1.5321		1.6187	1.4312	1.8063		1.4744	1.3172	1.6331		1.636	1.4571	1.8149
GTEx_FE_META_TISSUE_GE_MaxCPP	1.7168	-5.6366	9.0717		-3.8794	-30.7626	23.0038		1.0791	-10.259	12.4173		-4.1348	-29.141	20.8715
H3K27ac_Hnisz	1.574	1.4182	1.7298		1.8265	1.6259	2.027		1.6028	1.4355	1.7702		1.675	1.486	1.8654
H3K4me1_peaks_Trynka	1.5249	1.2667	1.7817		2.0255	1.7211	2.3314		1.7053	1.4355	1.975		2.0616	1.7731	2.3516
H3K9ac_peaks_Trynka	2.353	1.8784	2.8277		2.6935	2.1424	3.2461		2.5464	2.0385	3.0527		2.6127	2.0861	3.1379
Human_Enhancer_Villar	1.8034	1.284	2.3213		2.744	2.2261	3.2605		2.3242	1.8495	2.7988		2.7152	2.2232	3.2057
Human_Enhancer_Villar.extend.500	1.6894	1.2277	2.1511		2.4901	2.0082	2.972		2.1612	1.7327	2.5882		2.4786	2.027	2.9301
Intron_UCSC	0.6333	0.4775	0.7892		0.8007	0.6016	0.9998		0.6781	0.5122	0.844		0.8368	0.6492	1.0243
Intron_UCSC.extend.500	0.8295	0.6795	0.9796		1.1412	0.9507	1.3331		0.8772	0.7156	1.0373		1.0604	0.8786	1.2422
PromoterFlanking_Hoffman	1.7947	0.554	3.034		3.1797	2.0126	4.3468		2.8378	1.7875	3.8866		3.1292	2.0212	4.2372
Promoter_UCSC	1.6605	1.2061	2.1164		2.8234	2.3819	3.2648		2.3877	1.9693	2.8075		2.5666	2.1164	3.0167
Repressed_Hoffman	-1.7889	-2.001	-1.5783		-3.1999	-3.5346	-2.8652		-2.3155	-2.5608	-2.0703		-2.6877	-2.9763	-2.3978
SuperEnhancer_Hnisz	1.258	1.0445	1.473		1.4167	1.1498	1.6836		1.3042	1.0777	1.5307		1.4932	1.2422	1.7442
TSS_Hoffman	2.7628	2.1583	3.3658		3.5461	2.9445	4.1477		3.4711	2.9316	4.0107		3.5389	2.9676	4.1102
UTR_3_UCSC	2.317	1.486	3.1465		2.8176	1.8798	3.7568		2.7296	1.8842	3.5764		2.7527	1.8423	3.663
WeakEnhancer_Hoffman	1.196	0.3953	1.9952		2.0962	1.2191	2.9734		1.7846	0.9075	2.6603		2.4814	1.6865	3.2764
Table S6: Annotation Parameter estimated enrichment after providing MLE (univariate) summary statistics into the empical bayes annotation framework in (16). Annotation parameters are described in (18)
HDL-C = high-density cholesterol, LDL-C = low-density cholesterol, mash = multivariate adaptive shrinkage, mle=univariate maximum likelihood estimate,TC = total cholesterol, TG = triglycerides.
